# Supplementary material
Source: publisher figshare collection journal article supplement (https://acs.figshare.com/ndownloader/files/3964237)
Supplement: Supplementary file 1 [file 3964237]

## Supporting Information

### **Synthesis and characterization of dysprosium doped ZnO nanoparticles for photocatalysis of a textile dye under visible light irradiation**

Alireza Khataee<sup>a, \*</sup>, Reza Darvishi Cheshmeh Soltani<sup>b</sup>, Younes Hanifehpour<sup>c</sup>, Mahdie Safarpour<sup>a</sup>, Habib Gholipour Ranjbar<sup>a</sup>, Sang Woo Joo<sup>c, \*</sup>

<sup>a</sup> Research Laboratory of Advanced Water and Wastewater Treatment Processes, Department of Applied Chemistry, Faculty of Chemistry, University of Tabriz, Tabriz, Iran

<sup>b</sup> Department of Environmental Health, Faculty of Health, Arak University of Medical Sciences, Arak, Iran

<sup>c</sup> School of Mechanical Engineering, Yeungnam University, Gyeongsan 712-749 South Korea

\* Corresponding author (communicator)

E-mail address: a\_khataee@tabrizu.ac.ir (ar\_khataee@yahoo.com)

Tel.: +98 411 3393165; Fax: +98 411 3340191

\* Corresponding author

E-mail address: swjoo@yu.ac.kr

Tel: +82 53 810 1456

**Table S1.** Characteristics of Acid Red 17.

| Color Index Name         | Chemical structure                                                                | Molecular formula                                                                            | Color Index number | M <sub>w</sub> (g/mol) | λ <sub>max</sub> (nm) |
|--------------------------|-----------------------------------------------------------------------------------|----------------------------------------------------------------------------------------------|--------------------|------------------------|-----------------------|
| C. I. Acid Red 17 (AR17) | 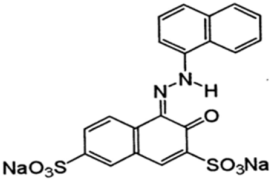 | C <sub>20</sub> H <sub>12</sub> N <sub>2</sub> Na <sub>2</sub> O <sub>7</sub> S <sub>2</sub> | 5858-33-3          | 502.43                 | 510                   |

The DRS spectra of undoped and Dy-doped ZnO samples are illustrated in Fig. S1. It can be seen that the samples showed a strong photoabsorption at visible light range. There is a red shift in absorbance spectra of Dy-doped ZnO in comparison to undoped ZnO, as expected for doped materials.

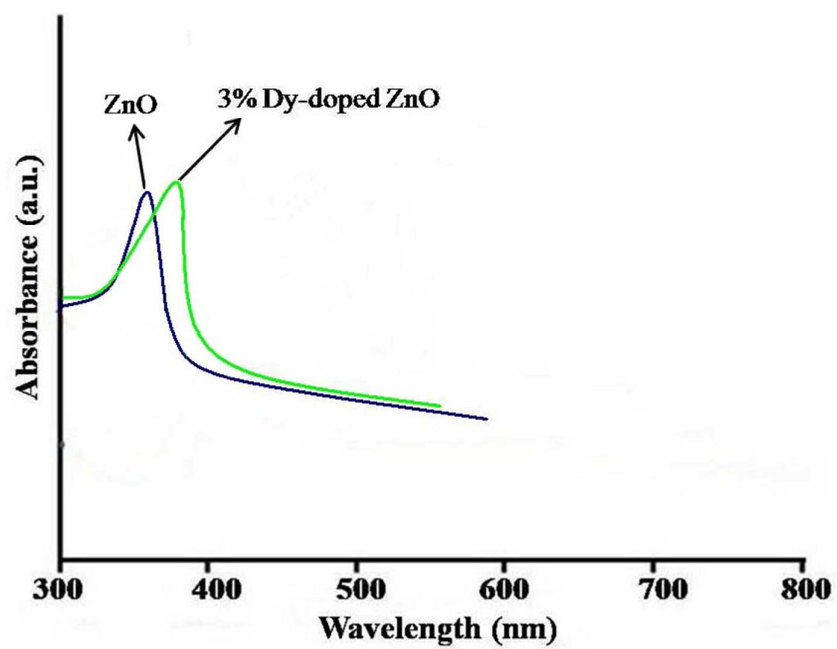

**Fig. S1.** UV-Vis diffuse reflectance spectra of the (a) undoped ZnO and (b) 3% Dy-doped ZnO samples.
